# Supplementary material for: Ionic liquid as porogen in the preparation of a polymer-based monolith for the separation of protein by high performance liquid chromatography
Source: Royal Society of Chemistry journal article supplement (doi:10.1039/c4ay02200a), 2014-11-10
Supplement: c4ay02200a1.pdf [file c4ay02200a1.pdf]

# **Ionic liquid as porogen in the preparation of a polymer-based monolith for the separation of protein by high performance liquid chromatography**

Ligai Bai\*, Jiafei Wang, Hang Zhang, Sha Liu, Junxiao Qin, Haiyan Liu\*

## **Figures in supporting information:**

**Fig. S1** The FT-IR of 1-butyl-3-methylimidazolium chloride.

**Fig. S2** The  $^1\text{H}$  NMR of 1-butyl-3-methylimidazolium chloride.

**Fig. S3** The  $^{13}\text{C}$  NMR of 1-butyl-3-methylimidazolium chloride.

**Fig. S4** The ESI-MS of 1-butyl-3-methylimidazolium chloride.

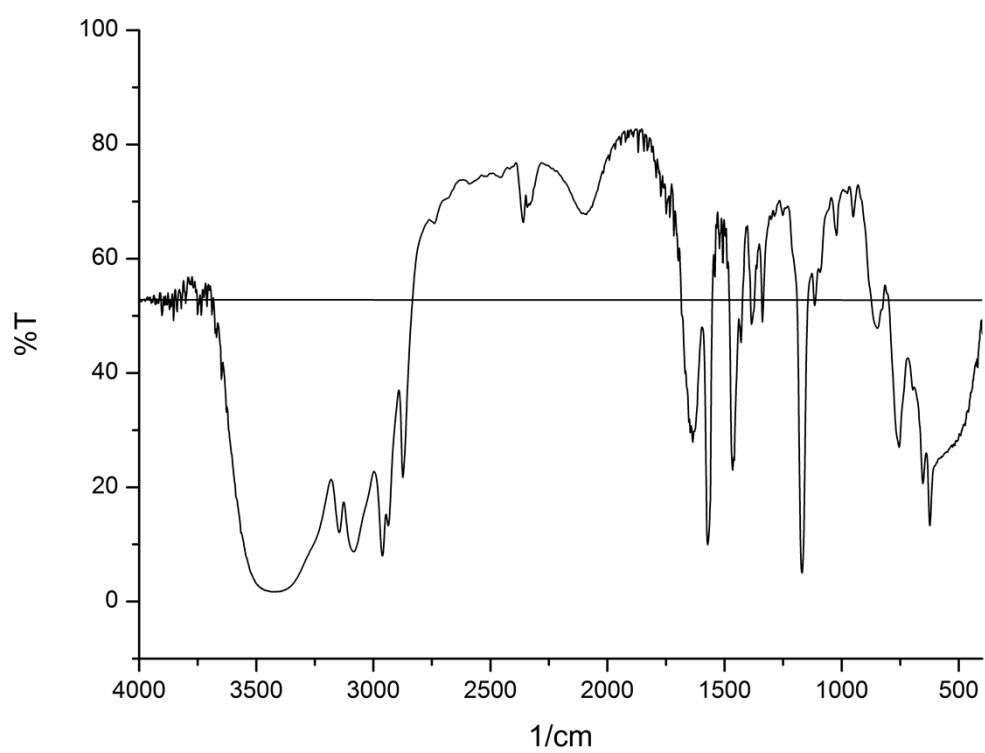

**Fig. S1**

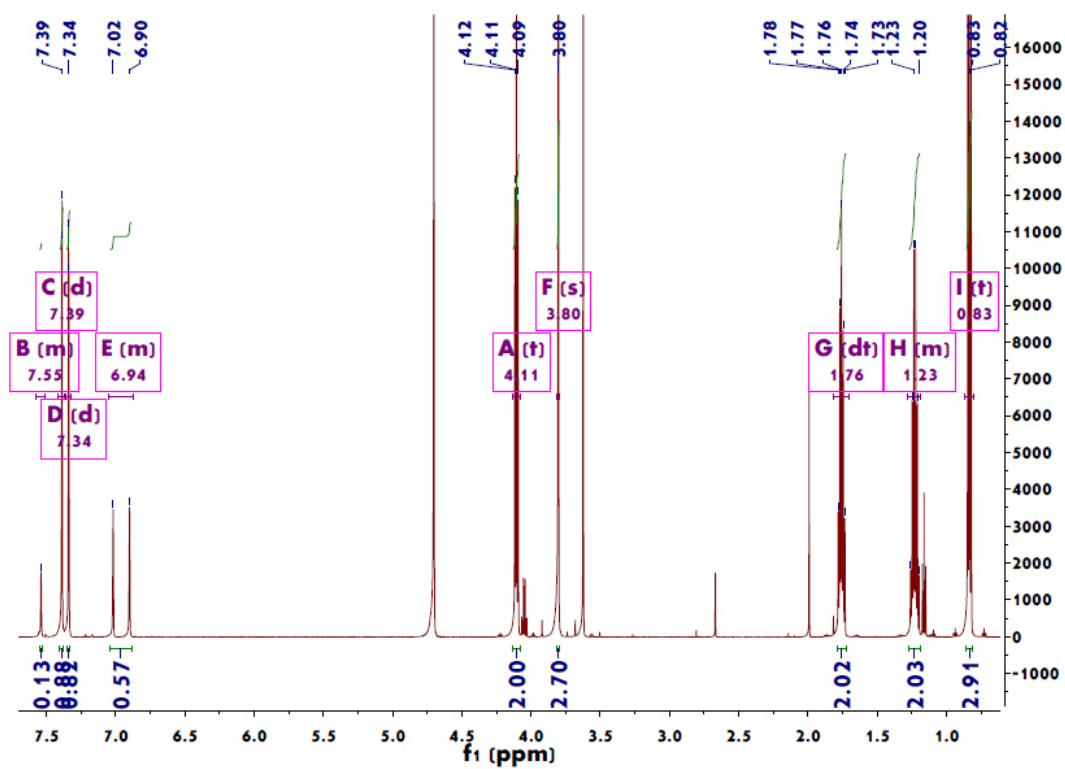

Fig. S2

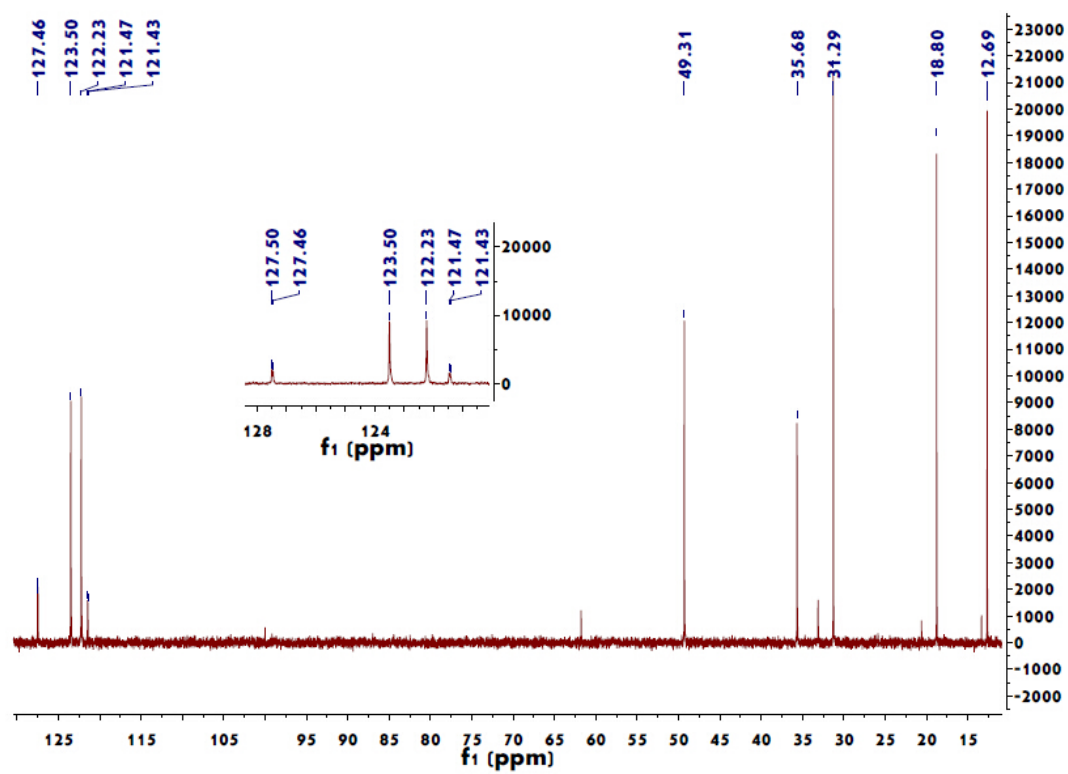

Fig. S3

## Mass Spectrum SmartFormula Report

### Analysis Info

Analysis Name D:\Data\20140425\WJF\_02\_000002.d  
Method SmallMS140419  
Sample Name  
Comment Any questions could be sent to ChuanqiZhou@163.com

Acquisition Date 2014/4/25 16:27:39

Operator ChuanqiZhou@163.com  
Instrument apex-Ultra

### Acquisition Parameter

|                          |            |                         |                    |                       |                          |
|--------------------------|------------|-------------------------|--------------------|-----------------------|--------------------------|
| Polarity                 | Positive   | Source                  | ESI                | No. of Laser Shots    | 20                       |
| Averaged Scans           | 2          | No. of Cell Fills       | 1                  | Laser Power           | 51.0 %                   |
| Broadband Low Mass       | 100.3 m/z  | End Plate               | 3500.0 V           | MALDI Plate           | 300.0 V                  |
| Broadband High Mass      | 1400.0 m/z | Capillary Entrance      | 4000.0 V           | Imaging Spot Diameter | 2000.0 $\mu$ m           |
| Acquisition Mode         | Single MS  | Skimmer 1               | 20.0 V             | Calibration Date      | Fri Apr 25 03:32:19 2014 |
| Pulse Program            | basic      | Drying Gas Temperature  | 180.0 $^{\circ}$ C | Data Acquisition Size | 131072                   |
| Source Accumulation      | 0.0 sec    | Drying Gas Flow Rate    | 4.0 L/min          | Apodization           | Sine-Bell Multiplication |
| Ion Accumulation Time    | 0.1 sec    | Nebulizer Gas Flow Rate | 1.0 L/min          |                       |                          |
| Flight Time to Acq. Cell | 0.0 sec    |                         |                    |                       |                          |

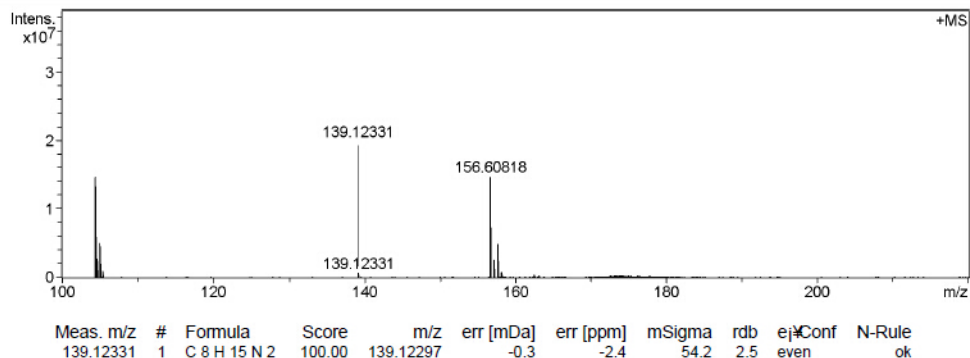

Fig. S4
